# Supplementary material for: Chronic post-stroke aphasia severity is determined by fragmentation of residual white matter networks
Source: PubMed Central journal article supplement (PMC5558035; doi:10.1038/s41598-017-07607-9), 2017-08-15
Supplement: 41598_2017_7607_MOESM1_ESM.pdf [file 41598_2017_7607_MOESM1_ESM.pdf]

## Chronic post-stroke aphasia severity is determined by fragmentation of residual white matter networks.

Barbara K Marebwa<sup>1</sup>, Julius Fridriksson<sup>2</sup>, Grigori Yourganov<sup>3</sup>, Lynda Feenaughty<sup>1,2</sup>, Chris Rorden<sup>3</sup>, Leonardo Bonilha<sup>1</sup>.

### Supplemental Material

Supplementary table S1 - Pairs of regions that when in the same module, are associated with a higher WAB-AQ score, Bonferroni corrected at  $p < 0.05$ . Overall, they indicate that temporal, inferior frontal, medial temporal and insular regions need to be connected for preservation of language.

| ROI 1                                      | - | ROI 2                                    | p values |
|--------------------------------------------|---|------------------------------------------|----------|
| superior frontal gyrus (posterior segment) | - | inferior frontal gyrus pars opercularis  | 1.97E-05 |
| middle frontal gyrus (posterior segment)   | - | inferior frontal gyrus pars opercularis  | 7.77E-08 |
| middle frontal gyrus (posterior segment)   | - | inferior frontal gyrus pars triangularis | 5.57E-06 |
| inferior frontal gyrus pars opercularis    | - | inferior frontal gyrus pars triangularis | 1.95E-07 |
| inferior frontal gyrus pars opercularis    | - | postcentral gyrus                        | 9.48E-08 |
| inferior frontal gyrus pars opercularis    | - | precentral gyrus                         | 6.33E-08 |
| inferior frontal gyrus pars opercularis    | - | supramarginal gyrus                      | 9.56E-06 |
| inferior frontal gyrus pars triangularis   | - | supramarginal gyrus                      | 1.82E-05 |
| inferior frontal gyrus pars opercularis    | - | angular gyrus                            | 5.10E-07 |
| lateral fronto-orbital gyrus               | - | superior temporal gyrus                  | 7.52E-06 |
| middle fronto-orbital gyrus                | - | superior temporal gyrus                  | 3.98E-09 |
| gyrus rectus                               | - | superior temporal gyrus                  | 3.16E-08 |
| superior temporal gyrus                    | - | pole of superior temporal gyrus          | 1.25E-09 |
| lateral fronto-orbital gyrus               | - | middle temporal gyrus                    | 1.11E-05 |
| gyrus rectus                               | - | middle temporal gyrus                    | 6.70E-08 |
| superior temporal gyrus                    | - | middle temporal gyrus                    | 9.29E-09 |
| pole of superior temporal gyrus            | - | middle temporal gyrus                    | 2.67E-06 |
| lateral fronto-orbital gyrus               | - | pole of middle temporal gyrus            | 1.32E-06 |
| gyrus rectus                               | - | pole of middle temporal gyrus            | 2.44E-08 |
| superior temporal gyrus                    | - | pole of middle temporal gyrus            | 1.14E-08 |
| pole of superior temporal gyrus            | - | pole of middle temporal gyrus            | 2.30E-06 |

|                                                 |   |                                      |          |
|-------------------------------------------------|---|--------------------------------------|----------|
| lateral fronto-orbital gyrus                    | - | inferior temporal gyrus              | 1.11E-05 |
| gyrus rectus                                    | - | inferior temporal gyrus              | 2.71E-08 |
| superior temporal gyrus                         | - | inferior temporal gyrus              | 4.61E-09 |
| pole of superior temporal gyrus                 | - | inferior temporal gyrus              | 8.96E-06 |
| middle temporal gyrus                           | - | inferior temporal gyrus              | 2.03E-05 |
| pole of middle temporal gyrus                   | - | inferior temporal gyrus              | 2.64E-05 |
| gyrus rectus                                    | - | parahippocampal gyrus                | 4.53E-07 |
| superior temporal gyrus                         | - | parahippocampal gyrus                | 1.02E-06 |
| lateral fronto-orbital gyrus                    | - | entorhinal are                       | 1.63E-05 |
| gyrus rectus                                    | - | entorhinal area                      | 6.14E-06 |
| lateral fronto-orbital gyrus                    | - | fusiform gyrus                       | 1.11E-05 |
| gyrus rectus                                    | - | fusiform gyrus                       | 2.03E-07 |
| superior temporal gyrus                         | - | fusiform gyrus                       | 3.43E-09 |
| gyrus rectus                                    | - | middle occipital gyrus               | 2.06E-05 |
| gyrus rectus                                    | - | inferior occipital gyrus             | 1.29E-05 |
| superior temporal gyrus                         | - | inferior occipital gyrus             | 1.58E-06 |
| gyrus rectus                                    | - | lingual gyrus                        | 6.23E-07 |
| superior temporal gyrus                         | - | lingual gyrus                        | 3.30E-07 |
| middle temporal gyrus                           | - | lingual gyrus                        | 2.96E-05 |
| superior temporal gyrus                         | - | subcallosal anterior cingulate gyrus | 2.71E-06 |
| middle temporal gyrus                           | - | subcallosal anterior cingulate gyrus | 4.41E-06 |
| pole of middle temporal gyrus                   | - | subcallosal anterior cingulate gyrus | 9.93E-07 |
| inferior temporal gyrus                         | - | subcallosal anterior cingulate gyrus | 1.04E-06 |
| fusiform gyrus                                  | - | subcallosal anterior cingulate gyrus | 1.04E-06 |
| lingual gyrus                                   | - | subcallosal anterior cingulate gyrus | 1.47E-05 |
| superior temporal gyrus                         | - | subgenual anterior cingulate gyrus   | 3.16E-08 |
| middle temporal gyrus                           | - | subgenual anterior cingulate gyrus   | 6.70E-08 |
| pole of middle temporal gyrus                   | - | subgenual anterior cingulate gyrus   | 2.44E-08 |
| inferior temporal gyrus                         | - | subgenual anterior cingulate gyrus   | 2.71E-08 |
| parahippocampal gyrus                           | - | subgenual anterior cingulate gyrus   | 4.53E-07 |
| entorhinal area                                 | - | subgenual anterior cingulate gyrus   | 6.14E-06 |
| fusiform gyrus                                  | - | subgenual anterior cingulate gyrus   | 2.03E-07 |
| inferior occipital gyrus                        | - | subgenual anterior cingulate gyrus   | 1.29E-05 |
| lingual gyrus                                   | - | subgenual anterior cingulate gyrus   | 6.23E-07 |
| middle frontal gyrus (dorsal prefrontal cortex) | - | insular                              | 1.35E-05 |
| lateral fronto-orbital gyrus                    | - | insular                              | 2.63E-08 |
| middle fronto-orbital gyrus                     | - | insular                              | 6.65E-08 |
| gyrus rectus                                    | - | insular                              | 3.49E-07 |
| superior temporal gyrus                         | - | insular                              | 6.95E-07 |
| middle occipital gyrus                          | - | insular                              | 1.10E-05 |
| lingual gyrus                                   | - | Insular                              | 5.66E-06 |
| subgenual anterior cingulate gyrus              | - | Insular                              | 5.69E-07 |

|                                          |   |                              |          |
|------------------------------------------|---|------------------------------|----------|
| superior temporal gyrus                  | - | Amygdala                     | 2.35E-07 |
| gyrus rectus                             | - | hippocampus                  | 8.56E-07 |
| superior temporal gyrus                  | - | hippocampus                  | 2.51E-08 |
| subgenual anterior cingulate gyrus       | - | hippocampus                  | 8.56E-07 |
| superior temporal gyrus                  | - | caudate nucleus              | 5.29E-08 |
| middle temporal gyrus                    | - | caudate nucleus              | 9.89E-08 |
| pole of middle temporal gyrus            | - | caudate nucleus              | 3.67E-08 |
| inferior temporal gyrus                  | - | caudate nucleus              | 4.00E-08 |
| parahippocampal gyrus                    | - | caudate nucleus              | 5.86E-07 |
| fusiform gyrus                           | - | caudate nucleus              | 2.62E-07 |
| middle occipital gyrus                   | - | caudate nucleus              | 8.43E-06 |
| inferior occipital gyrus                 | - | caudate nucleus              | 1.82E-06 |
| lingual gyrus                            | - | caudate nucleus              | 8.06E-07 |
| insular                                  | - | caudate nucleus              | 5.16E-06 |
| hippocampus                              | - | caudate nucleus              | 1.13E-06 |
| pole of superior temporal gyrus          | - | putamen                      | 2.34E-06 |
| parahippocampal gyrus                    | - | putamen                      | 6.92E-08 |
| entorhinal area                          | - | putamen                      | 1.06E-05 |
| amygdala                                 | - | putamen                      | 4.94E-06 |
| hippocampus                              | - | putamen                      | 2.84E-05 |
| superior temporal gyrus                  | - | nucleus innominata of mynert | 6.72E-09 |
| insular                                  | - | nucleus innominata of mynert | 8.12E-08 |
| superior temporal gyrus                  | - | nucleus accumbens            | 4.17E-12 |
| insular                                  | - | nucleus accumbens            | 6.76E-07 |
| inferior frontal gyrus pars opercularis  | - | cerebellum                   | 3.69E-07 |
| inferior frontal gyrus pars opercularis  | - | medulla                      | 1.83E-10 |
| middle frontal gyrus (posterior segment) | - | posterior insula             | 5.25E-06 |
| inferior frontal gyrus pars opercularis  | - | posterior insula             | 2.60E-07 |
| middle fronto-orbital gyrus              | - | posterior insula             | 8.63E-13 |
| angular gyrus                            | - | posterior insula             | 1.50E-09 |
| pre-cuneus                               | - | posterior insula             | 6.92E-06 |
| pole of superior temporal gyrus          | - | posterior insula             | 3.58E-12 |
| middle temporal gyrus                    | - | posterior insula             | 5.30E-10 |
| pole of middle temporal gyrus            | - | posterior insula             | 4.38E-11 |
| inferior temporal gyrus                  | - | posterior insula             | 5.30E-10 |
| parahippocampal gyrus                    | - | posterior insula             | 8.15E-13 |
| entorhinal area                          | - | posterior insula             | 9.39E-12 |
| fusiform gyrus                           | - | posterior insula             | 9.42E-08 |
| middle occipital gyrus                   | - | posterior insula             | 1.71E-06 |
| inferior occipital gyrus                 | - | posterior insula             | 2.53E-05 |
| lingual gyrus                            | - | posterior insula             | 9.35E-07 |
| amygdala                                 | - | posterior insula             | 3.53E-13 |

|                                      |   |                                   |          |
|--------------------------------------|---|-----------------------------------|----------|
| Hippocampus                          | - | posterior insula                  | 6.39E-09 |
| nucleus innominata of mynert         | - | posterior insula                  | 2.26E-13 |
| nucleus accumbens                    | - | posterior insula                  | 3.33E-12 |
| superior temporal gyrus              | - | posterior middle temporal gyrus   | 7.21E-08 |
| caudate nucleus                      | - | posterior middle temporal gyrus   | 2.01E-05 |
| posterior insula                     | - | posterior middle temporal gyrus   | 2.20E-06 |
| gyrus rectus                         | - | posterior inferior temporal gyrus | 2.71E-08 |
| superior temporal gyrus              | - | posterior inferior temporal gyrus | 8.66E-10 |
| subcallosal anterior cingulate gyrus | - | posterior inferior temporal gyrus | 1.04E-06 |
| subgenual anterior cingulate gyrus   | - | posterior inferior temporal gyrus | 2.71E-08 |
| caudate nucleus                      | - | posterior inferior temporal gyrus | 4.00E-08 |
| posterior insula                     | - | posterior inferior temporal gyrus | 6.56E-09 |

## Supplementary table S2 – Labels of brain regions included in the analysis

| index | - | Label                                           |
|-------|---|-------------------------------------------------|
| 1     | - | superior frontal gyrus (posterior segment)      |
| 2     | - | superior frontal gyrus (prefrontal cortex)      |
| 3     | - | superior frontal gyrus (frontal pole)           |
| 4     | - | middle frontal gyrus (posterior segment)        |
| 5     | - | middle frontal gyrus (dorsal prefrontal cortex) |
| 6     | - | inferior frontal gyrus pars opercularis         |
| 7     | - | inferior frontal gyrus pars orbitalis           |
| 8     | - | inferior frontal gyrus pars triangularis        |
| 9     | - | lateral fronto-orbital gyrus                    |
| 10    | - | middle fronto-orbital gyrus                     |
| 11    | - | gyrus rectus                                    |
| 12    | - | postcentral gyrus                               |
| 13    | - | precentral gyrus                                |
| 14    | - | Superior parietal gyrus                         |
| 15    | - | supramarginal gyrus                             |
| 16    | - | angular gyrus                                   |
| 17    | - | pre-cuneus                                      |
| 18    | - | superior temporal gyrus                         |
| 19    | - | pole of superior temporal gyrus                 |
| 20    | - | middle temporal gyrus                           |
| 21    | - | pole of middle temporal gyrus                   |
| 22    | - | inferior temporal gyrus                         |
| 23    | - | parahippocampal gyrus                           |
| 24    | - | entorhinal area                                 |
| 25    | - | fusiform gyrus                                  |
| 26    | - | superior occipital gyrus                        |

|    |   |                                      |
|----|---|--------------------------------------|
| 27 | - | middle occipital gyrus               |
| 28 | - | inferior occipital gyrus             |
| 29 | - | cuneus                               |
| 30 | - | lingual gyrus                        |
| 31 | - | rostral anterior cingulate gyrus     |
| 32 | - | subcallosal anterior cingulate gyrus |
| 33 | - | subgenual anterior cingulate gyrus   |
| 34 | - | dorsal anterior cingulate gyrus      |
| 35 | - | posterior cingulate gyrus            |
| 36 | - | insular                              |
| 37 | - | amygdala                             |
| 38 | - | hippocampus                          |
| 39 | - | caudate nucleus                      |
| 40 | - | putamen                              |
| 41 | - | globus pallidus                      |
| 42 | - | thalamus                             |
| 43 | - | hypothalamus                         |
| 44 | - | nucleus innominata of mynert         |
| 45 | - | nucleus accumbens                    |
| 46 | - | red nucleus                          |
| 47 | - | substantia nigra                     |
| 48 | - | cerebellum                           |
| 49 | - | cerebral peduncle                    |
| 50 | - | midbrain                             |
| 51 | - | pons                                 |
| 52 | - | medulla                              |
| 53 | - | mammillary body                      |
| 54 | - | posterior insula                     |
| 55 | - | posterior superior temporal gyrus    |
| 56 | - | posterior middle temporal gyrus      |
| 57 | - | posterior inferior temporal gyrus    |

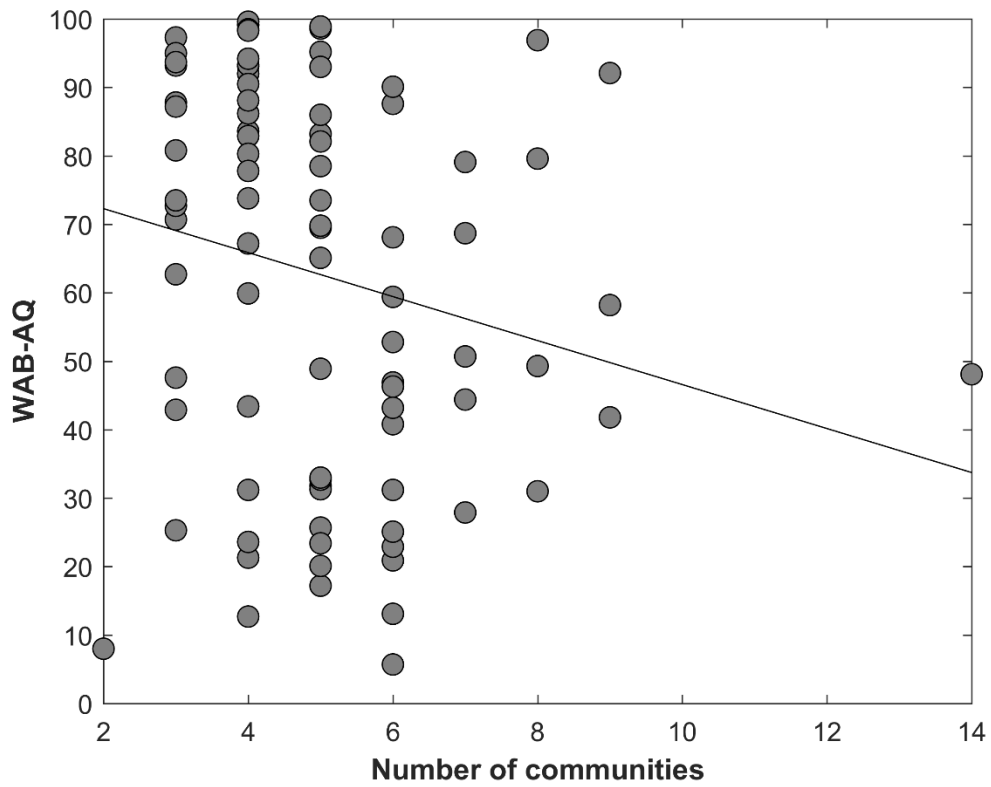

Supplementary figure 1. Correlation between number of communities in the left hemisphere and WAB-AQ ( $r = -0.2036$ ,  $p = 0.0271$ ). These correlations did not survive partial correlations accounting for grey or white matter damage.

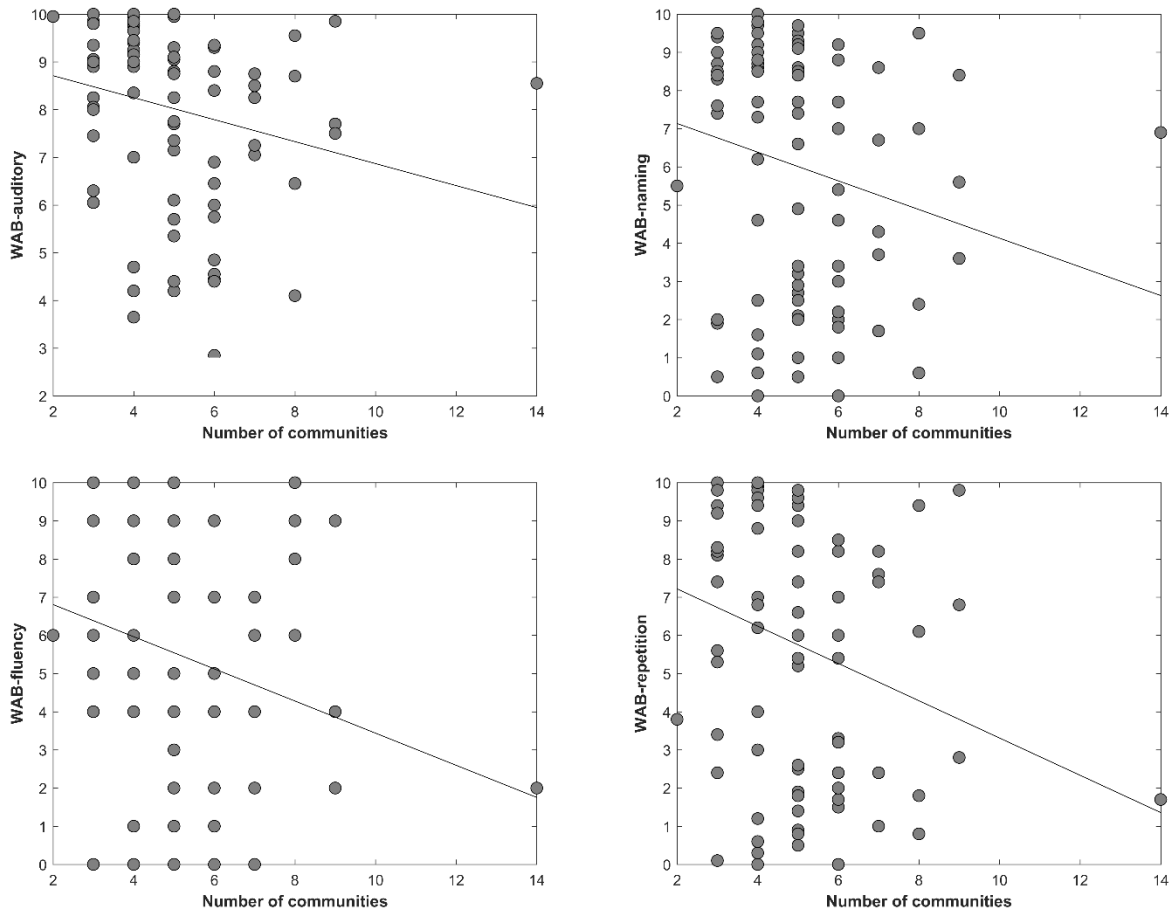

Supplementary figure 2. Correlation between number of communities in the left hemisphere and subsets of WAB-AQ: Auditory comprehension ( $r = -0.2149$ ,  $p = 0.0210$ ), Fluency ( $r = -0.2244$ ,  $p = 0.0167$ ), Naming ( $r = -0.2048$ ,  $p = 0.0264$ ), and Repetition ( $r = -0.2531$ ,  $p = 0.0081$ ). These correlations did not survive partial correlations accounting for grey or white matter damage.

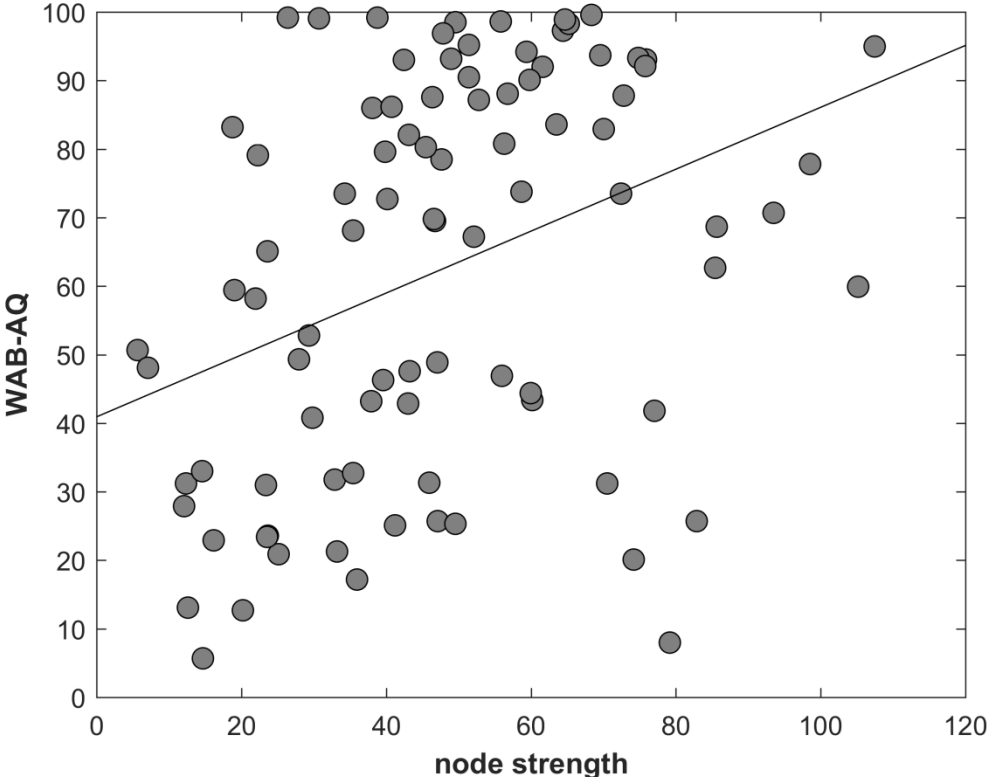

Supplementary figure 3. Correlation between lefth hemisphere node strength and WAB-AQ ( $r = 0.3625$ ,  $p < 0.0001$ ). These correlations did not survive partial correlations accounting for grey or white matter damage.



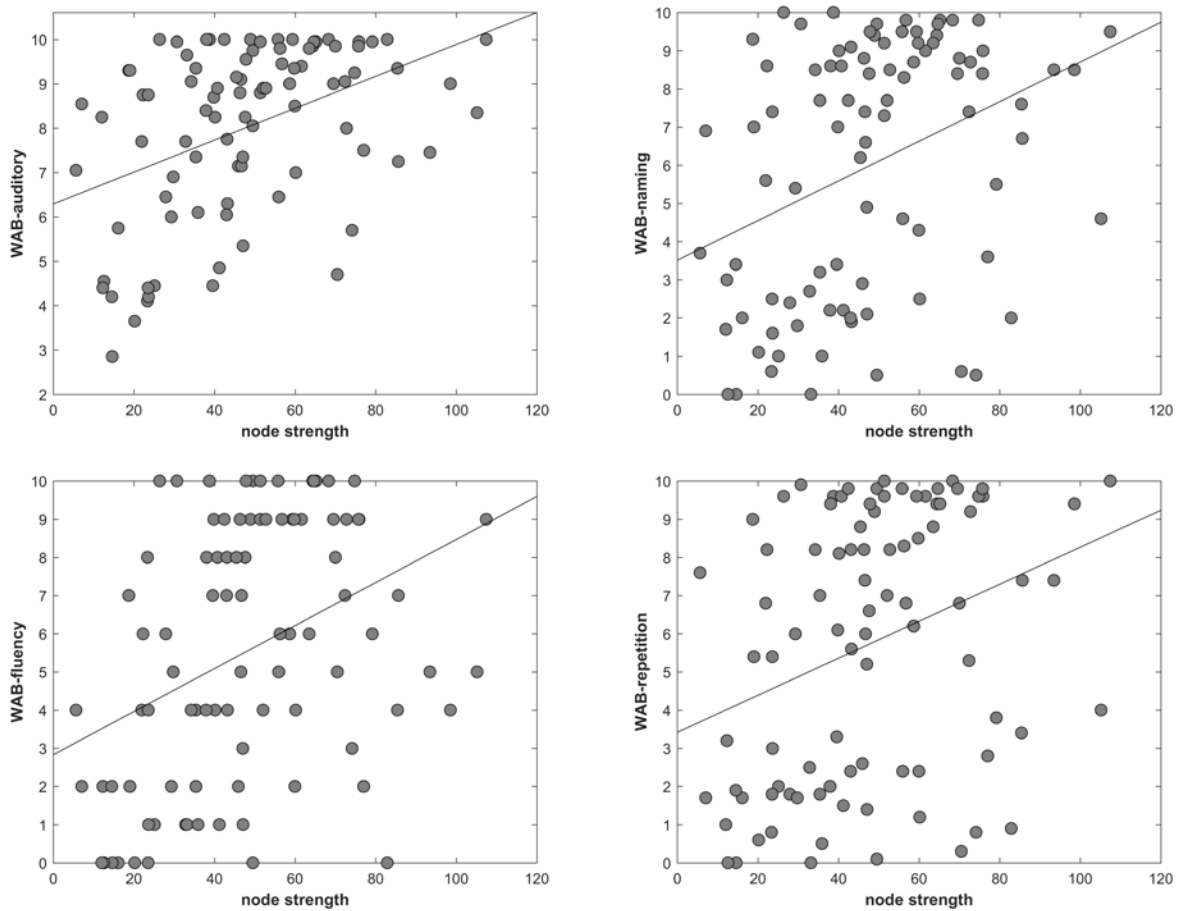

Supplementary figure 4. Correlation between left hemisphere node strength and subsets of WAB-AQ: Auditory comprehension ( $r = 0.4251$ ,  $p < 0.0001$ ), Fluency ( $r = 0.3803$ ,  $p < 0.0001$ ), Naming ( $r = 0.3585$ ,  $p < 0.0001$ ), and Repetition ( $r = 0.3182$ ,  $p = 0.0011$ ). These correlations did not survive partial correlations accounting for grey or white matter damage.
